# Supplementary material for: Nano-aggregates of furan-2-carbohydrazide derivatives displaying enhanced emission with a bathochromic shift
Source: Royal Society of Chemistry journal article supplement (doi:10.1039/c9ra07290j), 2019-01-01

## Supporting Information (SI)

### Nano-aggregates of Furan-2-Carbohydrazone derivatives displaying enhanced emission with bathochromic-shift

Ge Ding<sup>\*1#</sup>, Xinchao Wang<sup>\*2#</sup>, Xiujuan Li<sup>2</sup>, Hongpan Liu<sup>1</sup>, Lunxiang Wang<sup>1</sup>, Na Liu<sup>1</sup>, Fang Gao<sup>\*3</sup>, Zhenqiang Wang<sup>\*4</sup>

<sup>1</sup>College of Materials and Chemical Engineering, Chongqing University of Arts and Sciences, Chongqing, China, 402160

<sup>2</sup>College of Pharmacy, Heze University, Heze, Shandong Province, China, 274000

<sup>3</sup>College of Chemistry and Chemical Engineering, Chongqing University, Chongqing, China, 400044

<sup>4</sup>College of Chemistry, Chongqing Normal University, Chongqing, China, 401331

Emails: dingge1989cqu@126.com, wxc198566@126.com, 772630581@qq.com, fanggao1971@126.com

# Xinchao Wang and Ge Ding are designated as the co-first authors, who make equal contribution to this study

## Table of contents

| Items                                                                         | pages     |
|-------------------------------------------------------------------------------|-----------|
| 1. Figures of photophysical properties                                        | Page 2-4  |
| 2. Detail synthesis and characterization                                      | Page 5-6  |
| 3. <sup>1</sup> H NMR spectra of precursor compounds                          | Page 7    |
| 4. <sup>1</sup> H NMR and <sup>13</sup> C-NMR spectra of the target compounds | page 8-10 |

## 1. Figures of photophysical properties

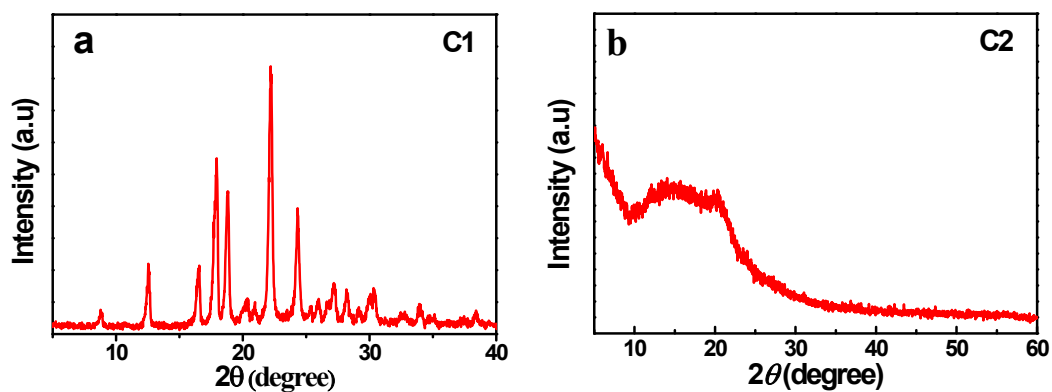

Figure S1 Measured XRD pattern of powder of C1 (a) and C2 (b)

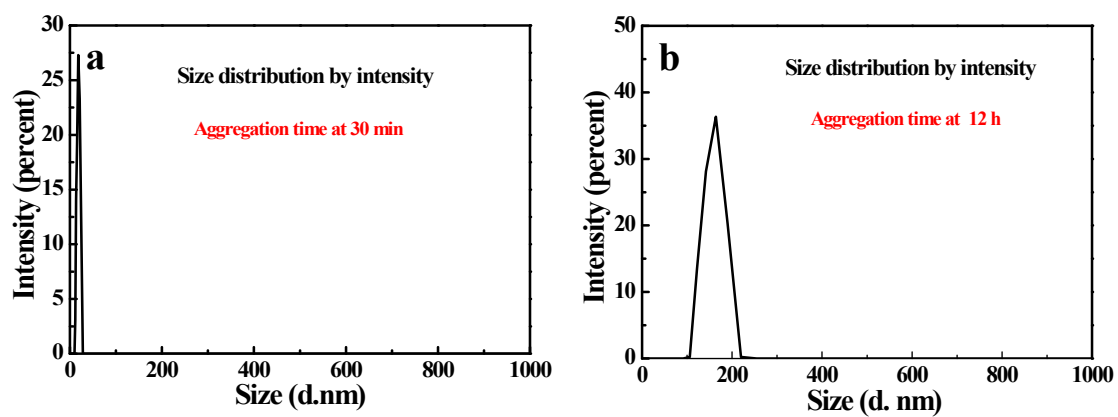

Figure S2 Size distribution of C1 aggregates (at 30 min (a) and 12 h (b) respectively) in THF/H<sub>2</sub>O (40/60 (v/v)) mixture solution ( $1 \times 10^{-5}$  mol/L) obtained by DLS.

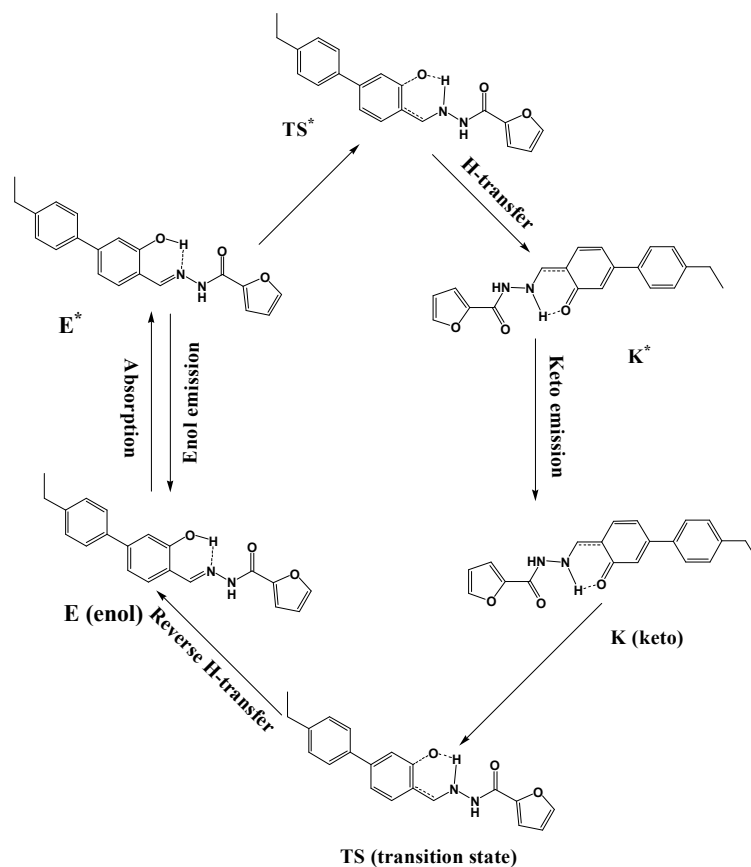

**Figure S3** Four-level cycle of internal proton transfer in the excited state for C1

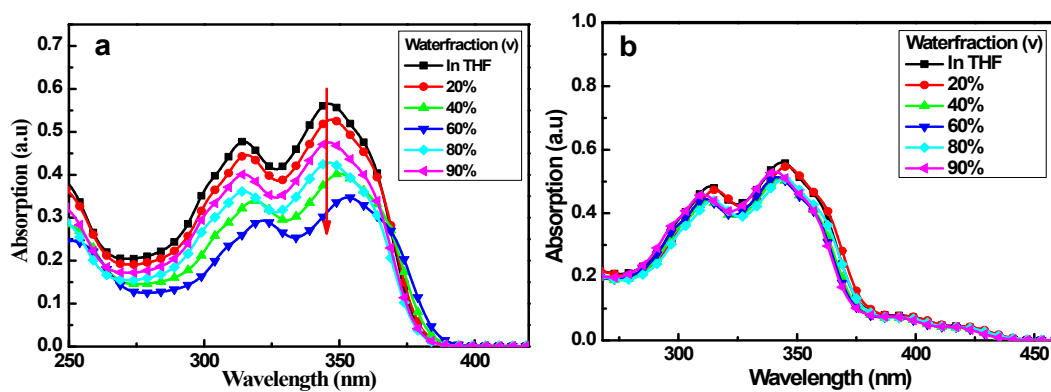

**Figure S4** UV/visible absorption spectra of C1 (a) and C2 (b) in THF/H<sub>2</sub>O mixed solution with different water

volume fractions (*v*), the concentration is  $2 \times 10^{-5}$  mol/L respectively.

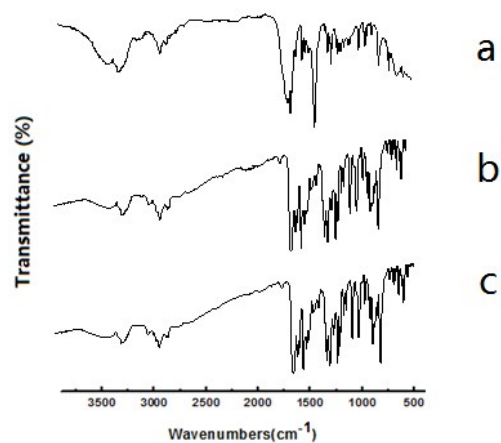

**Figure S5** IR spectra of **C1**, (a) in pure THF solution (the concentration is 0.1 mol/L), (b) in solid state and (c) in aggregate state.

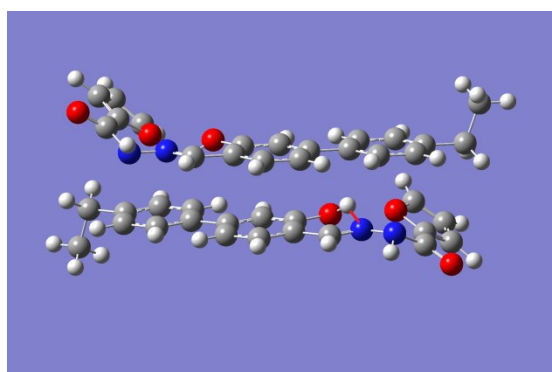

**Figure S6** Simulated *J*-type stacking modes of **C1** molecule utilizing the  $\pi$ - $\pi$  stacking interaction and intramolecular hydrogen bond interaction (O-H $\cdots$ N, red line).

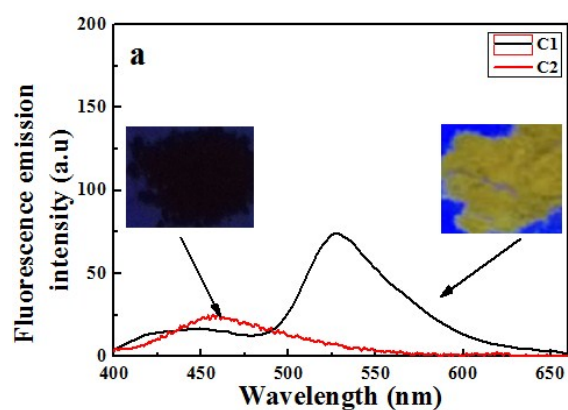

**Figure S7** Emission spectra of **C1** and **C2** in solid state, excited at 350 nm, the images are solid state **C1** and **C2** respectively under UV lamp at 365 nm.

## 2. Detail synthesis and characterization

### Intermediate 1

#### 4'-ethyl-3-hydroxy-[1, 1'-biphenyl]-4-carbaldehyde

4-Bromo-2-hydroxybenzaldehyde (1.05 g, 5 mmol) and 4-Ethylphenylboronic acid (2.440 g, 20 mmol) in 100 ml dry THF were added into a three-necked flask. The reaction is carried out under the protection of argon, and potassium carbonate (2.15 g, 15 mmol) was added into the mixed solution after 0.5 h, after 0.5 h of continuous reaction, catalyst tetrakis(triphenylphosphine)palladium (112 mg, 0.50 mmol, 5 mol%) was added and reflux for 12 h. After the reaction, the solvent was evaporated under vacuum. Recrystallization from ethanol and cyclohexane gave the pure material as faint yellow solid (yield ~51%, m.p. 210.6~211.8 °C). <sup>1</sup>H-NMR (400 MHz, CDCl<sub>3</sub>) δ (ppm): 11.116 (s, OH, 1H), 9.909 (s, -CH=N-, 1H), 7.609-7.551 (m, Ar-H, 4H), 7.317-7.297 (d, J=8.0 Hz, Ar-H, 2H), 7.243-7.212 (t, J=6.2 Hz, Ar-H, 1H), 2.740-2.633 (t, -CH<sub>2</sub>, 2H), 1.302-1.264 (t, J=7.6 Hz, -CH<sub>3</sub>, 3H). Elementary analysis, Anal. Calcd for C<sub>15</sub>H<sub>14</sub>O<sub>2</sub>: C, 79.62; H, 6.24. Found: C, 79.45; H, 6.33.

### Target C1

#### N'-((4'-ethyl-3-hydroxy-[1,1'-biphenyl]-4-yl)methylene)furan-2-carbohydrazide

4'-ethyl-3-hydroxy-[1,1'-biphenyl]-4-carbaldehyde (1.05 g, 5 mmol) and Furan-2-Carbohydrazide (2.440 g, 20 mmol) in 100 ml dry ethanol were added into a three-necked flask. The reaction mixture was stirred at room temperature under argon protection for 12 hours. After the reaction, the solvent was evaporated under vacuum. Recrystallization from ethanol and cyclohexane gave the pure material as faint yellow solid (yield ~62%, m.p. 256.6~257.8 °C). <sup>1</sup>H-NMR (400 MHz, DMSO-*d*<sub>6</sub>) δ (ppm): 12.123 (s, -OH, 1H), 11.206 (s, -NH-, 1H), 8.619 (s, -

CH=N-, 1H), 7.909-7.870 (m, Ar-H, 1H), 7.621-7.513 (m, furan-H, 3H) , 7.294-7.274 (d,  $J=8.0$  Hz, Ar-H, 2H), 7.208-7.128 (m, Ar-H, 4H), 2.646-2.590 (m, -CH<sub>2</sub>-, 2H), 1.200-1.162 (t,  $J=16$  Hz, -CH<sub>3</sub>, 3H). <sup>13</sup>C-NMR (151 MHz, DMSO-*d*<sub>6</sub>)  $\delta$  (ppm): 168.263, 163.287, 145.110, 140.120, 139.264, 138.336, 138.115, 137.582, 132.605, 129.608, 128.860, 127.046, 126.604, 118.182, 113.876, 111.594, 106.739, 106.704, 28.261, 15.992. Elementary analysis, Anal. Calcd for C<sub>20</sub>H<sub>18</sub>N<sub>2</sub>O<sub>3</sub>: C, 71.84; H, 5.43; N, 8.38. Found: C, 71.92; H, 5.31; N, 8.32.

## Reference C2

### N'-((4'-ethyl-3-methoxy-[1,1'-biphenyl]-4-yl)methylene)furan-2-carbohydrazide

N'-((4'-ethyl-3-hydroxy-[1,1'-biphenyl]-4-yl)methylene)furan-2-carbohydrazide (0.94 g, 10 mmol) and sodium hydroxide (1.60 g, 40 mmol) in DMSO (20 mL) was treated with methyl iodide (2.48 g, 20 mmol) and maintained at room temperature for 30 min. The reaction mixture was diluted with water (20 mL) and extracted with light petroleum. The combined petroleum extracts were washed with aqueous sodium hydroxide and dried with MgSO<sub>4</sub>, the solvent was evaporated under vacuum. Recrystallization from ethanol and cyclohexane gave the pure material as faint yellow solid (yield ~66%, m.p. 260.6~261.9 °C). <sup>1</sup>H-NMR (400 MHz, DMSO-*d*<sub>6</sub>)  $\delta$  (ppm): 11.207 (s, -NH-, 1H), 8.619 (s, CH=N-, 1H), 7.939-7.867 (m, Ar-H, 3H), 7.617-7.491 (m, furan-H, 3H), 7.239-7.128 (m, Ar-H, 5H), 3.757 (s, -OCH<sub>3</sub>, 3H), 3.354-3.329 (m, -CH<sub>2</sub>-, 2H), 1.089-1.086 (d,  $J=12$  Hz, -CH<sub>3</sub>). <sup>13</sup>C-NMR (151 MHz, DMSO-*d*<sub>6</sub>)  $\delta$  (ppm): 168.672, 145.738, 144.452, 141.957, 141.364, 138.734, 137.254, 128.423, 127.060, 126.520, 123.775, 123.733, 122.070, 115.343, 56.981, 29.736, 15.515. Elementary analysis, Anal. Calcd for C<sub>21</sub>H<sub>20</sub>N<sub>2</sub>O<sub>3</sub>: C, 72.40; H, 5.79; N, 8.04. Found: C, 72.38; H, 5.75; N, 8.21.

### 3. <sup>1</sup>H NMR spectra of precursor compounds

#### Intermediate

4'-ethyl-3-hydroxy-[1,1'-biphenyl]-4-carbaldehyde

<sup>1</sup>H-NMR (CDCl<sub>3</sub>)

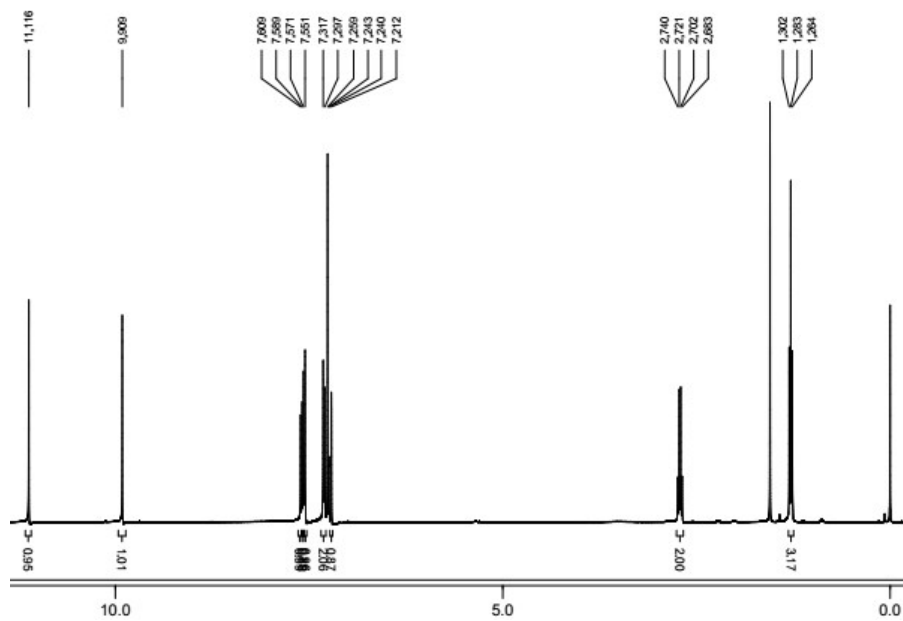

#### 4. The characterization of the target compounds

##### Target molecule C1

$^1\text{H-NMR}$  (DMSO- $d_6$ )

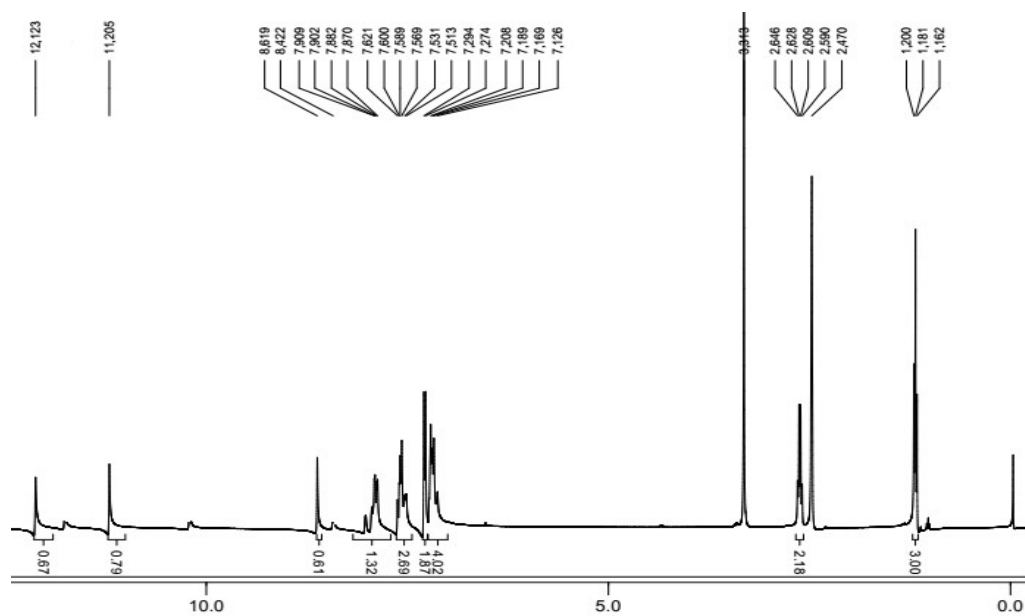

$^{13}\text{C-NMR}$  (DMSO- $d_6$ )

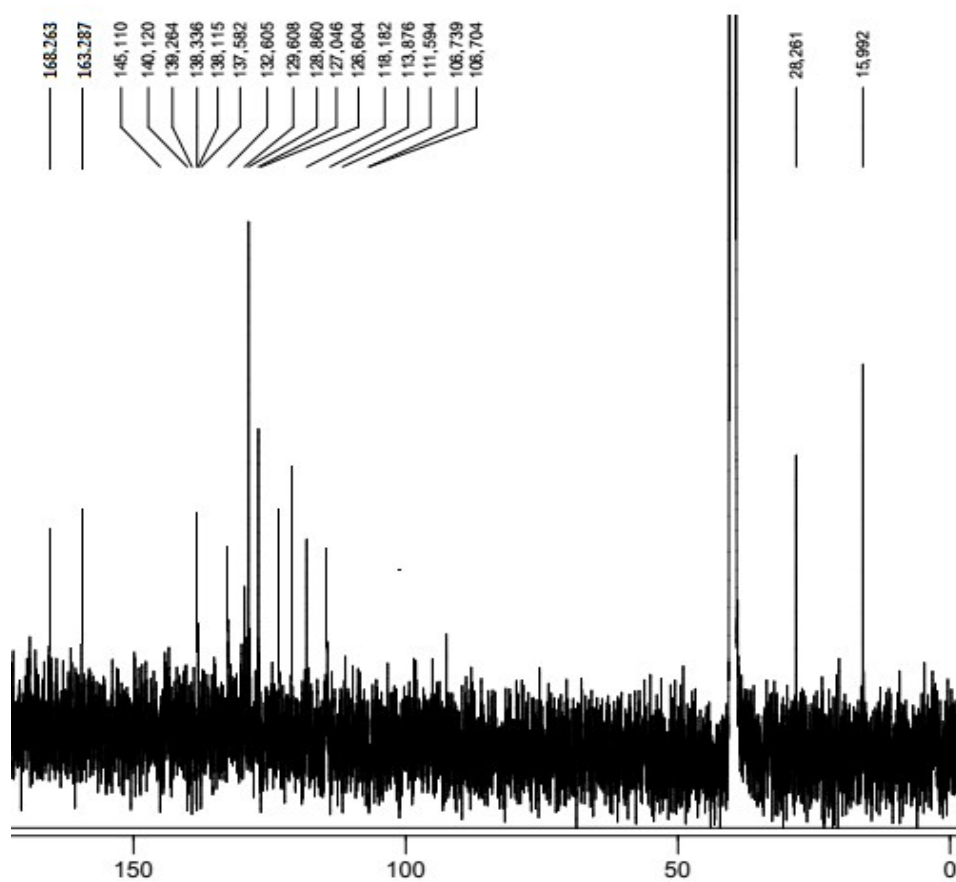



**Reference C2**

<sup>1</sup>H-NMR (DMSO-*d*<sub>6</sub>)

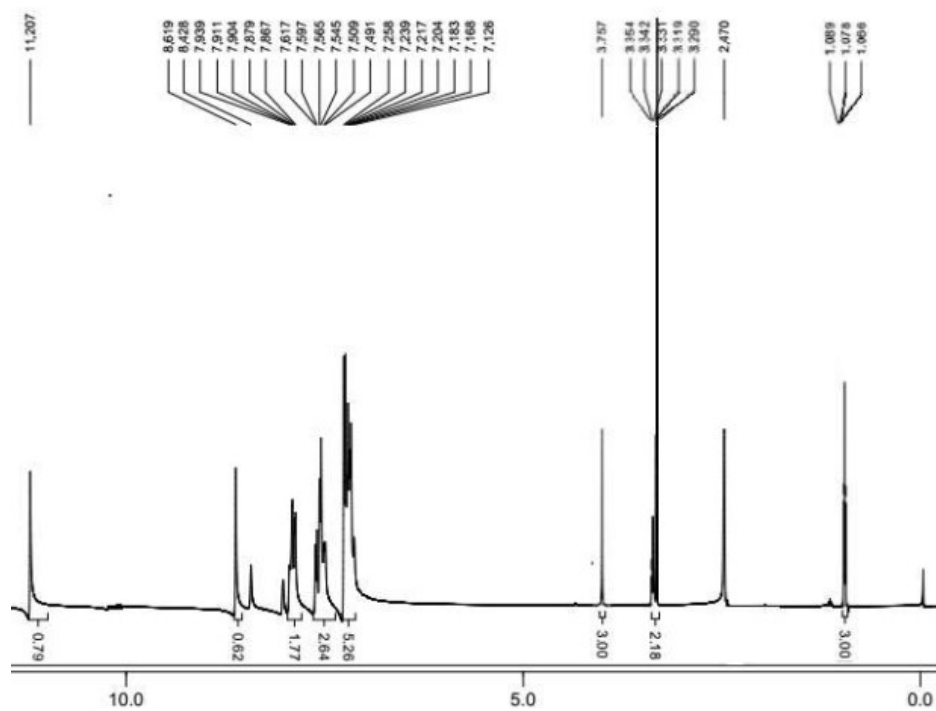

<sup>13</sup>C-NMR (DMSO-*d*<sub>6</sub>)

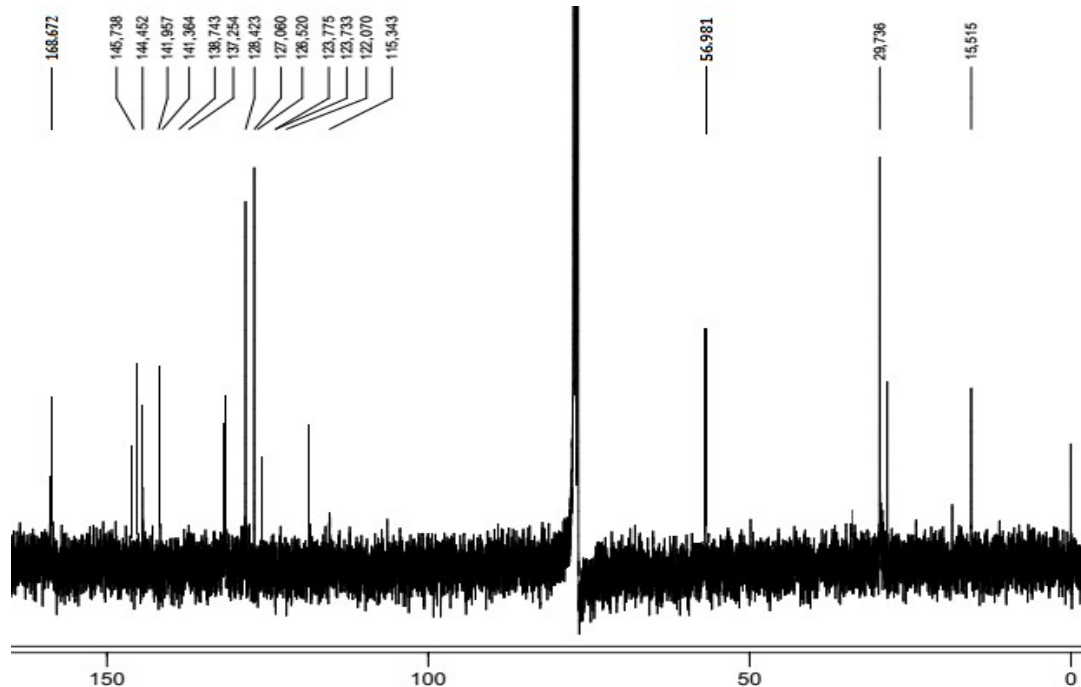

Supplement: c9ra07290j1.pdf [file c9ra07290j1.pdf]
